# Supplementary material for: Advanced glycation end products impair bone marrow mesenchymal stem cells osteogenesis in periodontitis with diabetes via FTO-mediated N6-methyladenosine modification of sclerostin
Source: Springer Nature journal article supplement (doi:10.1186/s12967-023-04630-5), 2023-11-04

**Additional file 5: The uncropped blots of WB**

**Figure S2. Uncropped blot of figure 4H**

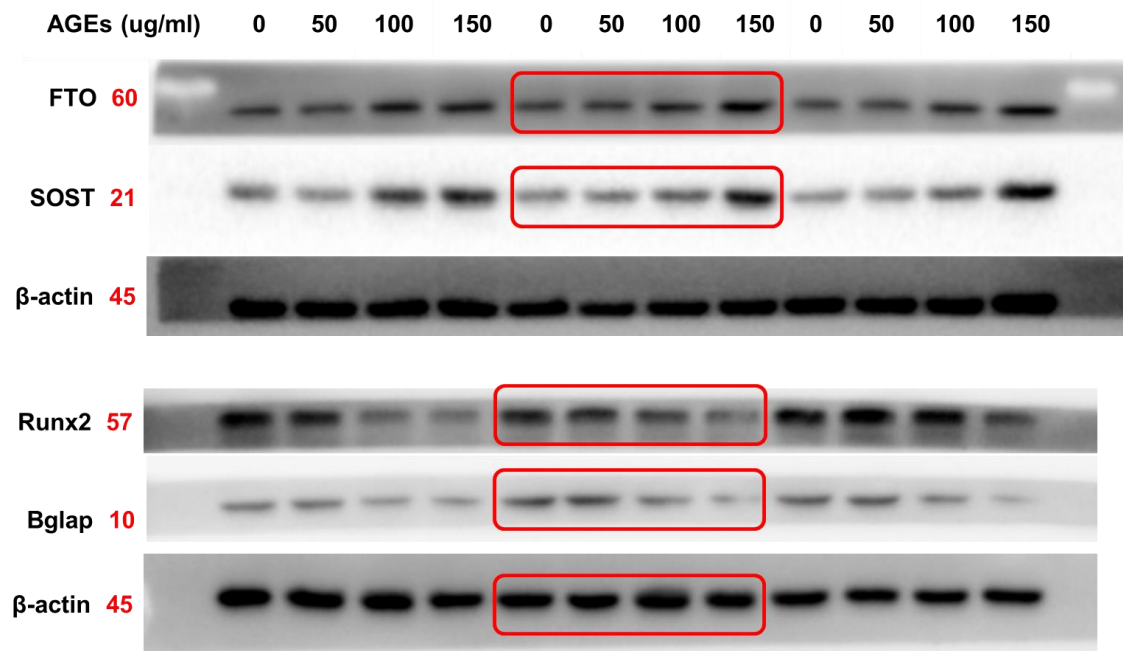

**Figure S3. Uncropped blot of figure 5C**

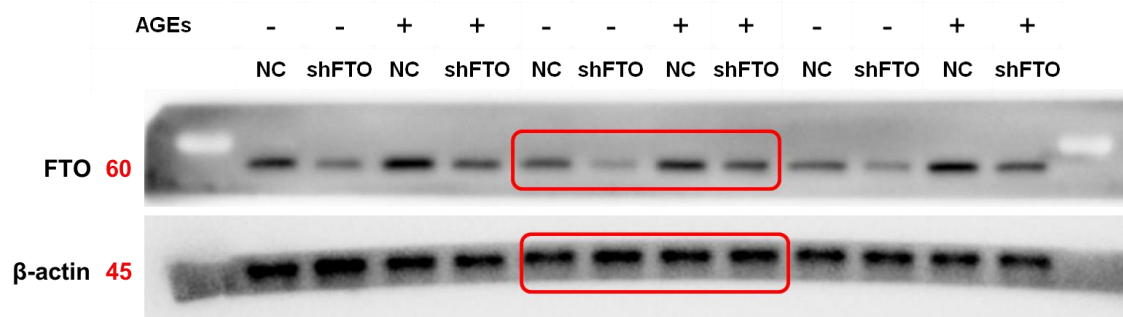

**Figure S4. Uncropped blot of figure 5G**

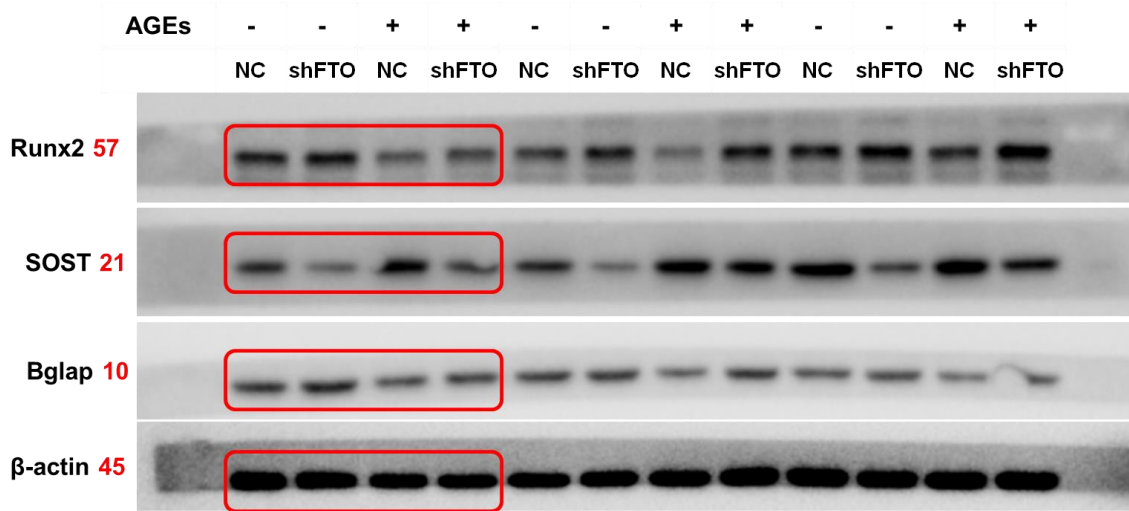

**Figure S5. Uncropped blot of figure 6E**

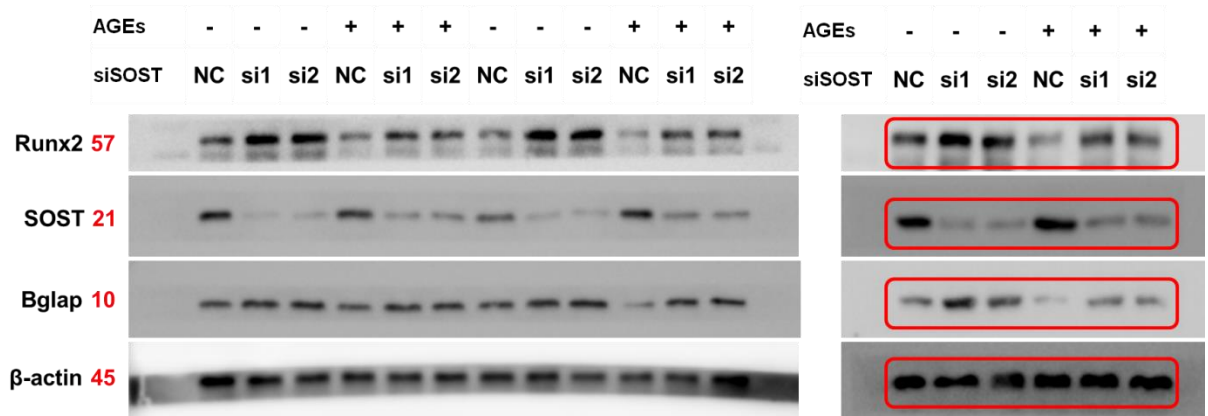

**Figure S6. Uncropped blot of figure 6G**

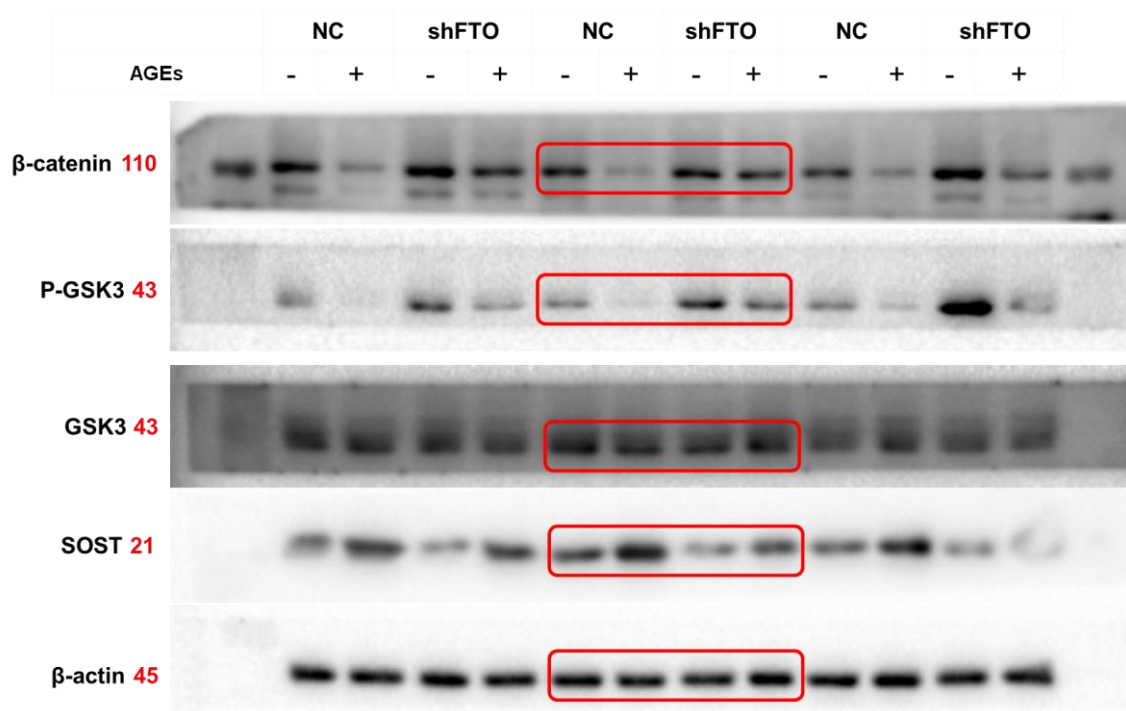

**Figure S7. Uncropped blot of figure 6H**

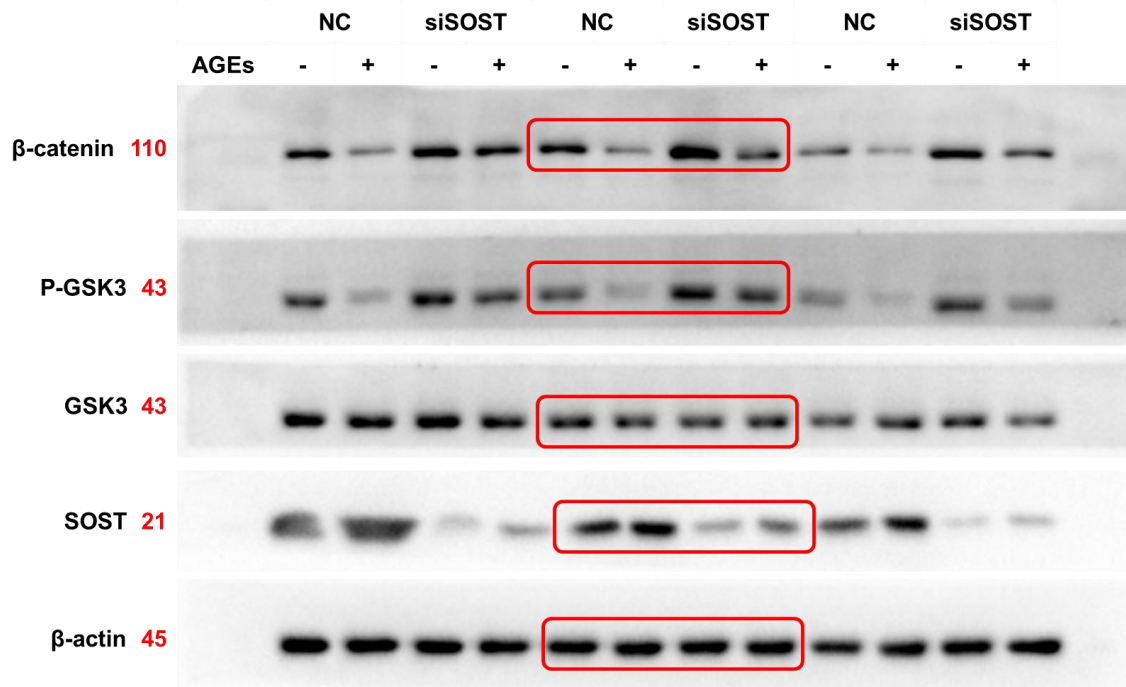

Supplement: MOESM5 [file 26264866]
